# Supplementary material for: Mapping the Shh long-range regulatory domain
Source: PubMed Central journal article supplement (PMC4197689; doi:10.1242/dev.108480), 2014-10
Supplement: supp_141.20.3934_DEV108480.pdf [file supp_141.20.3934_DEV108480.pdf]

Figure S1- shows 2 examples of a number tetraploid complementation embryos which were derived from the same ES line. This demonstrates the consistency of the staining pattern and its intensity between embryos.

Anderson et al., Supplementary Figure 1

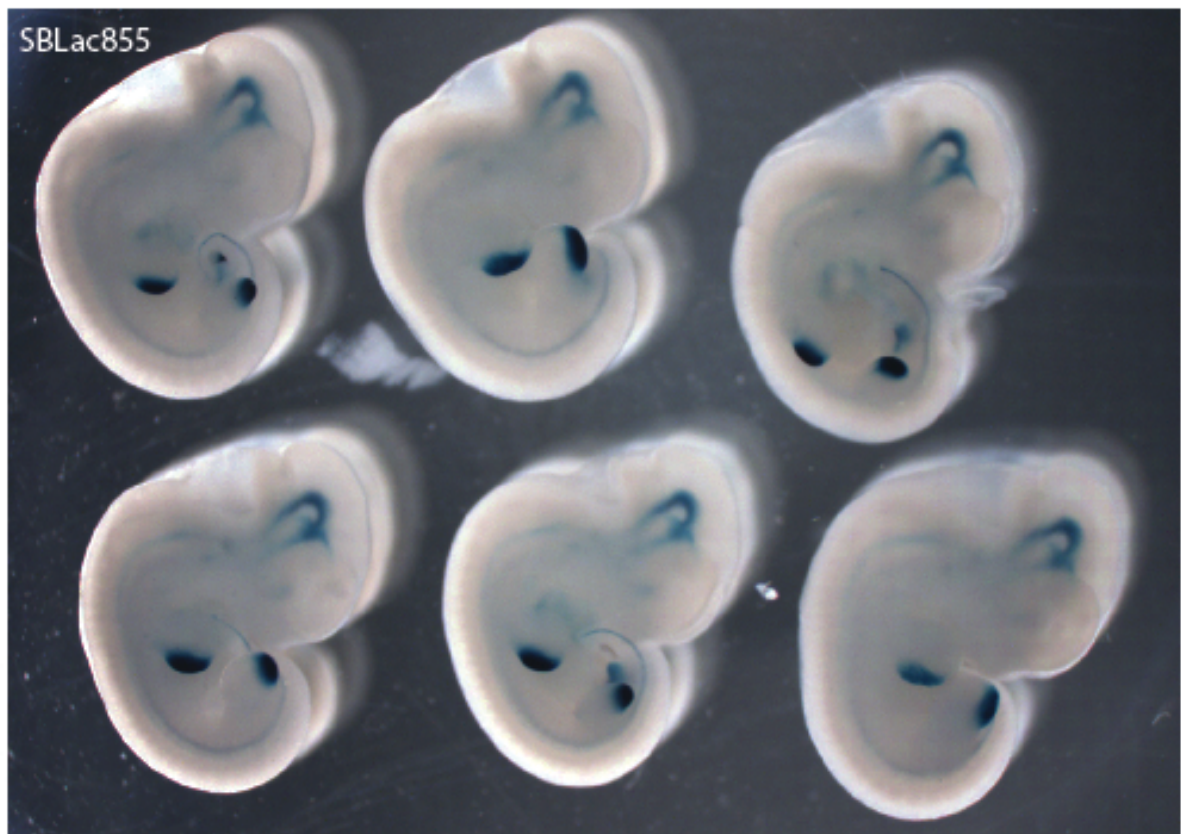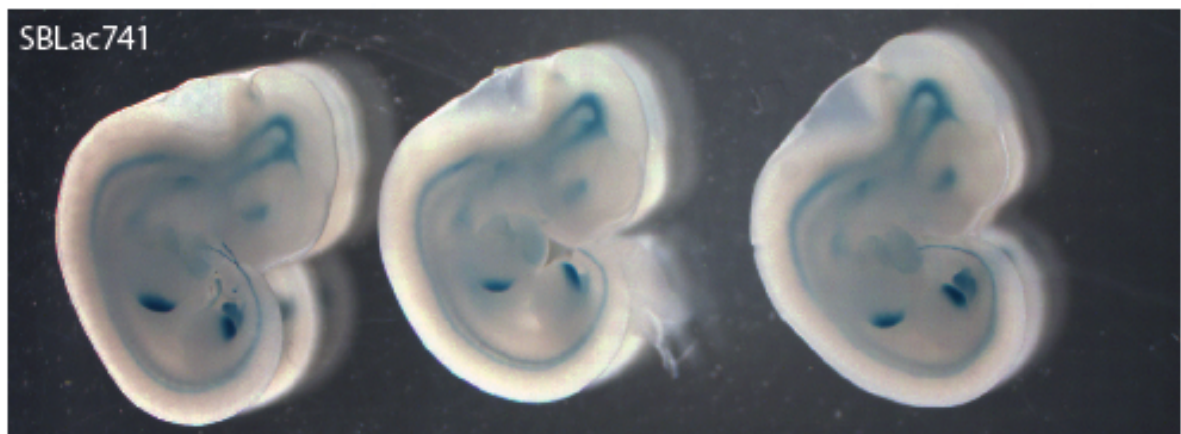

Table S1- PCR primers

| Targeting Vector Primers                          |                        |                                                                         |
|---------------------------------------------------|------------------------|-------------------------------------------------------------------------|
| Vector 1                                          | arm 1(F)               | GATCATGCGGCCGCGGCGCGCCAAGCAAAGCACCAGCCATT                               |
|                                                   | (R)                    | GATCATATCGAT GACCAATGAGCTCCAAGGAT                                       |
|                                                   | arm 2(F)               | GATCATATCGATCCAAGCCTCAGCTGTTCTTC                                        |
|                                                   | (R)                    | GATCATCTGCAGTTAATTAAGGCAGTGAAGGATTTGGAA                                 |
| Vector 2                                          | arm 1(F)               | GATCATGCGGCCGCTTAATTAACCACATCCGATAGAGGGCTA                              |
|                                                   | (R)                    | GATCATATCGATAAGCTTGTTTGCAATCCTACCAGCAA                                  |
|                                                   | arm 2(F)               | GATCATATCGATAAGCTTGGGCCTCATCAAGGAATTTT                                  |
|                                                   | (R)                    | GATCATGTCGACGGCGCGCCCTCATGAGCCCTTCCATACTG                               |
| Screening of ES cell clones for correct targeting |                        |                                                                         |
|                                                   | M13                    | TGAAAACGACGGCCAGTGAGC                                                   |
|                                                   | Neo                    | GCCTTCTATCGCCTTCTTCTTGACG                                               |
|                                                   | 3'F2                   | GCCATGTTAGTCACATCATGCAC                                                 |
|                                                   | 3'R2                   | CATTTACCACATCCCTAGCTGTG                                                 |
|                                                   | 5'F2                   | TCAAGTCTGACTAGGATAACTTAG                                                |
|                                                   | 5'R2                   | TAGTTTGAGCCTTAGGTGTGCAC                                                 |
| Screening of the SB transposon re-insertion       |                        |                                                                         |
|                                                   | Puro:<br>PGK           | CGTGGGCTTGTA CTGCGTC<br>GACAGCACCGCTGAGCAATG                            |
|                                                   | Lac(F)<br>(R)          | CAACTTAATCGCCTTGCAGCAC<br>CGCTGATTTGTGTAGTCGGTT                         |
| Identifying the pHLED re-insertion site           |                        |                                                                         |
|                                                   | SBR1                   | CTTCTGACCCACTGGGAATGTGATG                                               |
|                                                   | SBR2                   | GTGGTGATCCTAACTGACCTAAGAC                                               |
|                                                   | SBR3                   | TCCTAACTGACCTAAGACAGG                                                   |
|                                                   | SBL1                   | CTGGAATTGTGATACAGTGAATTATAAGTG                                          |
|                                                   | SBL2                   | CTTGTGTCATGCACAAAGTAGATGTCC                                             |
|                                                   | SBL3                   | AAGTAGATGTCCTAACTGACTTGC                                                |
|                                                   | KmonP-<br>N7-<br>CTCAG | GTACGAGAATCGCTGTCCTNNNNNNNCTCAG                                         |
|                                                   | KmonP-<br>N7-<br>TCCTG | GTACGAGAATCGCTGTCCTNNNNNNNTCCTG                                         |
|                                                   | KmonP                  | GTACGAGAATCGCTGTCCT                                                     |
| Cloning the in situ probes                        |                        |                                                                         |
|                                                   | Nom1                   | GATCATGTCGACGGCTCAGGTTCTGAGACTCG<br>GATCATGCGGCCGCGTCAACACCCTCCGTAGGAA  |
|                                                   | Rnf32                  | GATCATGTCGACTCAGCCATGCCCAATATGTA<br>GATCATGCGGCCGCACAGATGTGCACAGGACAGG, |
|                                                   | Rbm33                  | GATCATGTCGACGGGCAACACTTGAGACCATT                                        |

|                 |       |                                                                       |
|-----------------|-------|-----------------------------------------------------------------------|
|                 |       | GATCATGCGGCCGCGCCTGGACATCAGTGGTGGATG,                                 |
|                 | Lmbr1 | GATCATGTTCGACCTGTGATGTCCAGAACA<br>GATCATGCGGCCGCGATTCTGTAAGATGAATCAG. |
| RT-PCR analysis |       |                                                                       |
|                 | Nom1  | GGCTCAGGTTCTGAGACTCG<br>GTCAACACCCTCCGTAGGAA                          |
|                 | Lmbr1 | GCTGGTTGATGAGACTGCAA<br>GTGCTTTCTGATGCCCATTT                          |
|                 | Rnf32 | TCAGCCATGCCCAATATGTA<br>ACAGATGTGCACAGGACAGG                          |
|                 | Shh   | GCCTACAAGCAGTTTATTCCCAAC<br>CAGTGGATGTGAGCTTTGGATTC                   |
|                 | Rbm33 | GGCAACACTTGAGACCATT<br>CTGGACATCAGTGGTGGATG                           |
|                 | Cnpy1 | GCGAATGAACGATTACCAG<br>AATAAGTTCGAATATCTCATCTTC                       |
|                 | En2   | CTGCACGCGCTATTCTGAC<br>GAGACTCGTTCAGGCTGAG                            |
|                 | HPRT  | CACAGGACTAGAACACCTGC<br>GCTGGTGAAAAGGACCTCT                           |

Table S2 – Position of the SBLac insertions obtained within 1Mb of the initial insertion.

| Insertion   | Chromosome | strand | Start site |
|-------------|------------|--------|------------|
| 7           | 5          | neg    | 28787130   |
| 13          | 5          | neg    | 29445046   |
| 46          | 5          | pos    | 29116092   |
| SBLac(-290) | 5          | neg    | 28505362   |
| 68          | 5          | neg    | 29639709   |
| 92          | 5          | pos    | 29444355   |
| 98          | 5          | pos    | 28797914   |
| 102         | 5          | pos    | 29630364   |
| 104         | 5          | neg    | 29622149   |
| 109         | 5          | pos    | 28994110   |
| 115         | 5          | pos    | 28978743   |
| 118         | 5          | neg    | 29634908   |
| SBLac96     | 5          | neg    | 28889280   |
| 130         | 5          | neg    | 29583183   |
| SBLac485    | 5          | pos    | 29279078   |
| 148         | 5          | pos    | 29066794   |
| 148         | 5          | pos    | 29066794   |
| 156         | 5          | neg    | 29870513   |
| 189         | 5          | pos    | 29116275   |
| 198         | 5          | pos    | 29647904   |
| SBLac855    | 5          | neg    | 29648912   |
| SBLac741    | 5          | neg    | 29535017   |
| 232         | 5          | pos    | 29797578   |
| SBLac526    | 5          | neg    | 29319708   |
| 277         | 5          | pos    | 29266136   |
| 288         | 5          | pos    | 29011233   |
| 302         | 5          | neg    | 28996239   |
| 305         | 5          | pos    | 29498715   |
| SBLac936    | 5          | neg    | 29729576   |
| SBLac(-109) | 5          | pos    | 28684534   |
| 330         | 5          | neg    | 29798033   |
| SBLac(-15)  | 5          | neg    | 28777971   |
| 360         | 5          | pos    | 29794971   |
| SBLac(-3)   | 5          | pos    | 28790598   |
| 376         | 5          | pos    | 29403698   |
| 392         | 5          | neg    | 29653752   |
| 393         | 5          | neg    | 28996029   |
| 393         | 5          | neg    | 28996029   |
| 396         | 5          | pos    | 29003367   |
| 397         | 5          | neg    | 29654566   |

|          |   |     |          |
|----------|---|-----|----------|
| 2112     | 5 | pos | 29471537 |
| SBLac695 | 5 | neg | 29489073 |
| 2134     | 5 | pos | 29515622 |
| 2157     | 5 | neg | 29591086 |
| 2161     | 5 | pos | 29472020 |
| 2179     | 5 | pos | 29475308 |
| 2191     | 5 | neg | 29468681 |
| SBLac796 | 5 | pos | 29589741 |
| 3109     | 5 | neg | 29649217 |
| 3119     | 5 | pos | 29810217 |
| 3137     | 5 | pos | 29626757 |
| 3139     | 5 | neg | 29653746 |
